# Supplementary material
Source: PubMed Central journal article supplement (PMC18888)

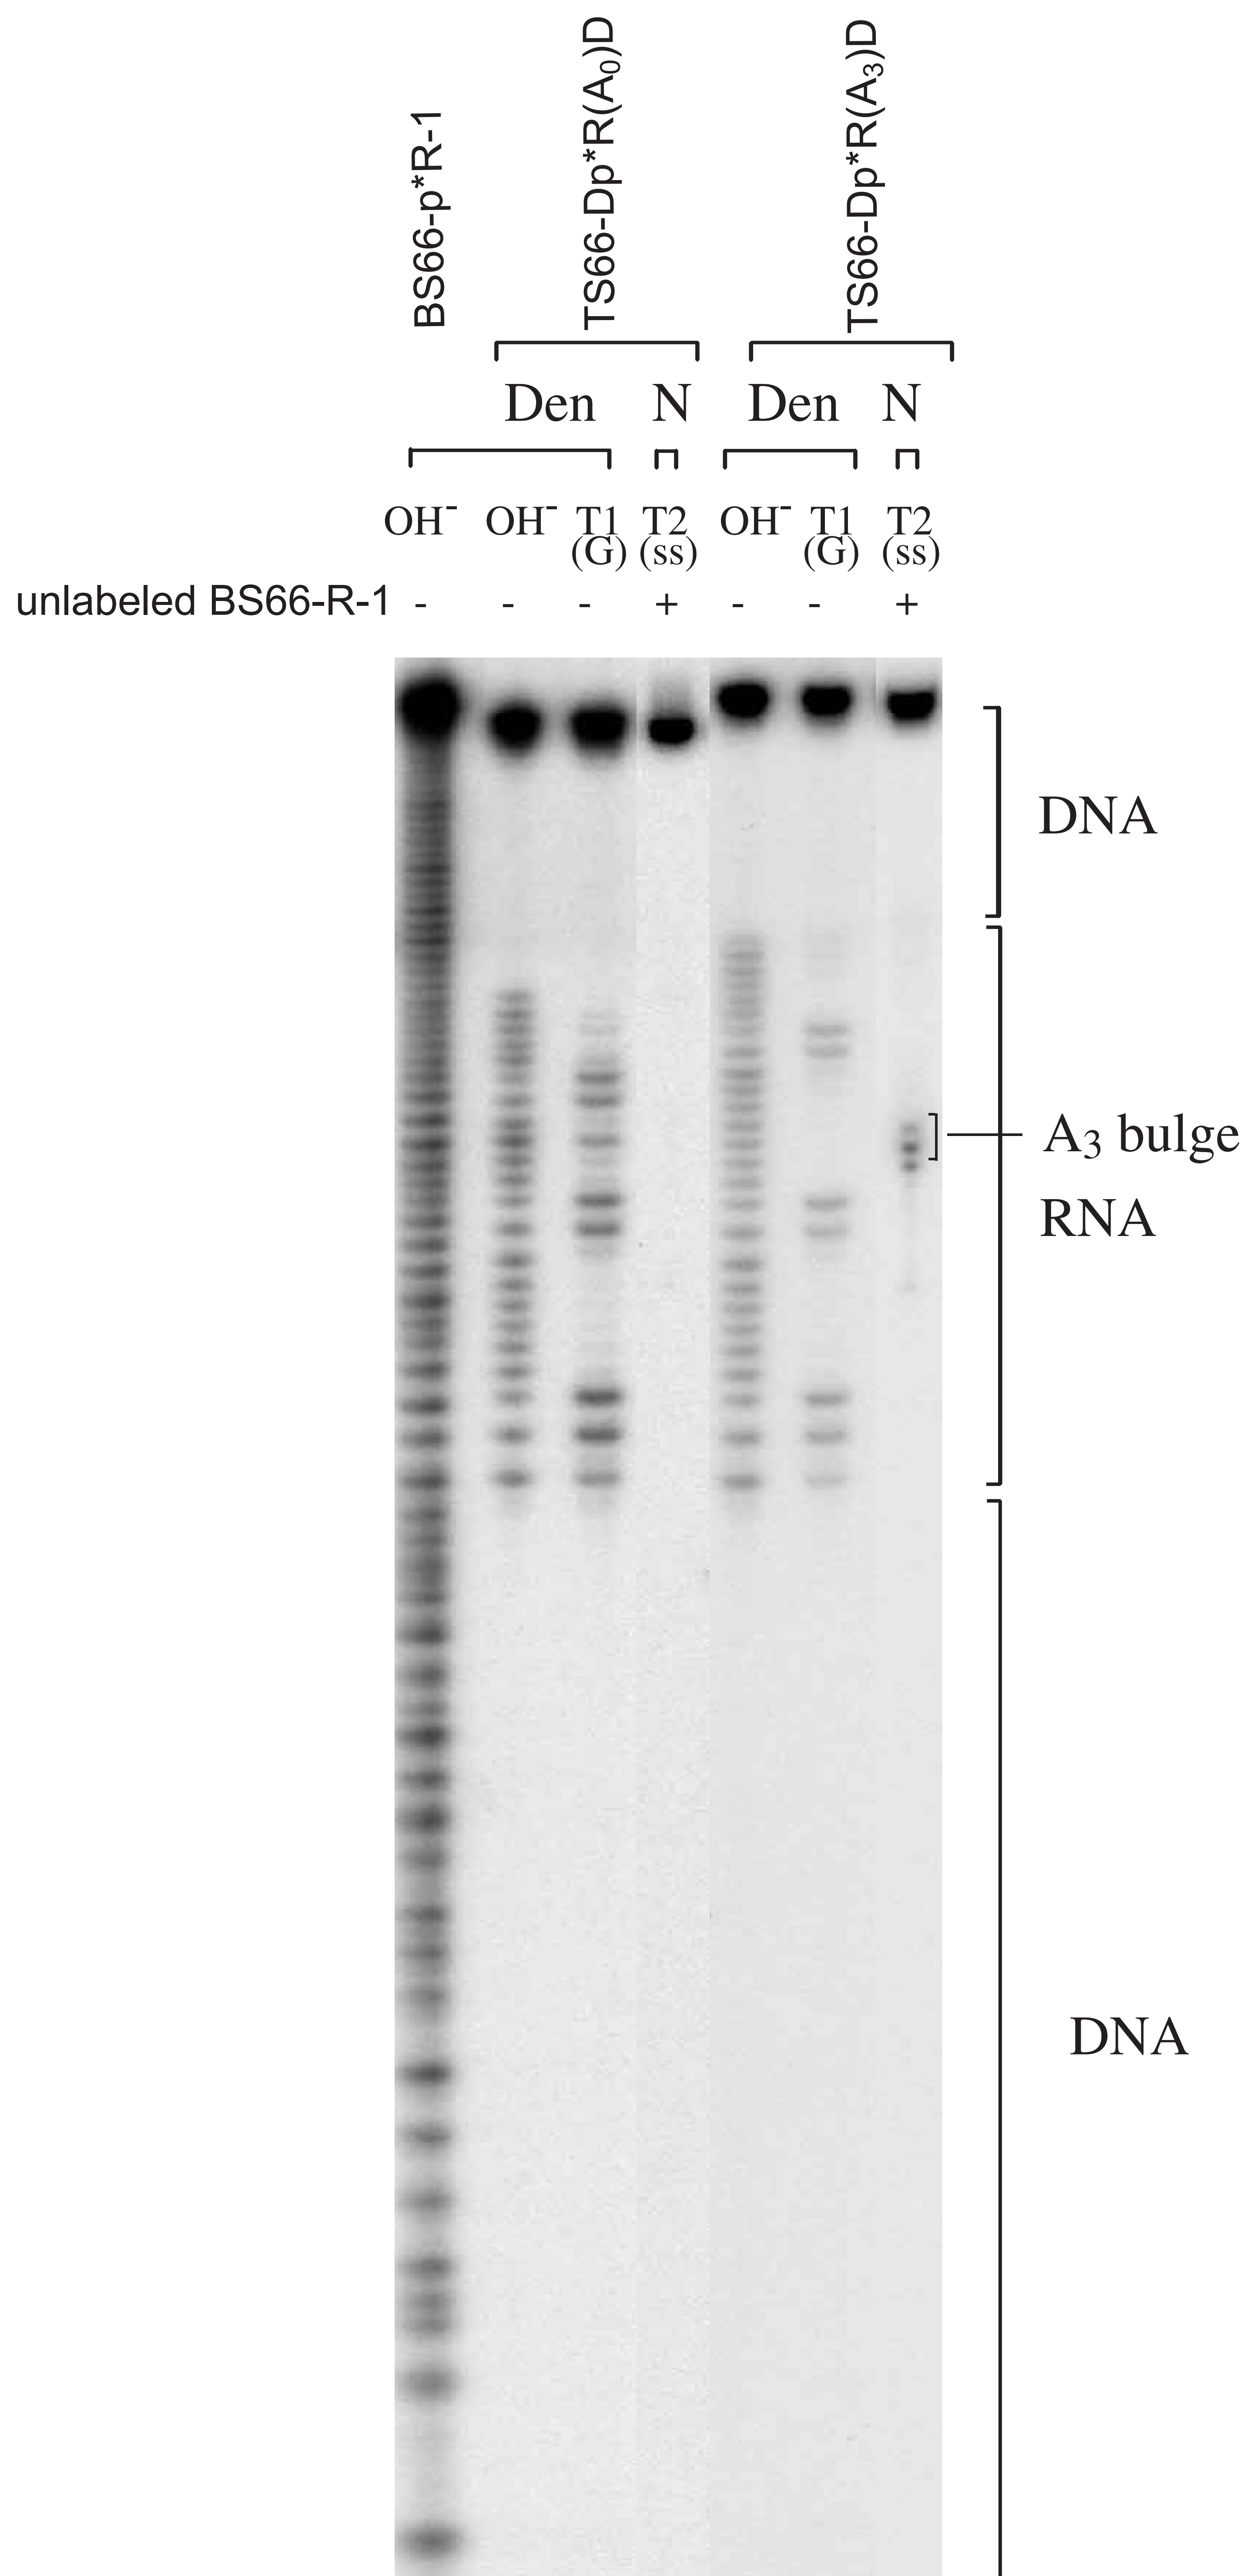

Supplement: pnas_011355798_2.pdf [file pnas_011355798_2.pdf]
